# Supplementary material for: The impact on healthcare, policy and practice from 36 multi-project research programmes: findings from two reviews
Source: Springer Nature journal article supplement (doi:10.1186/s12961-017-0191-y), 2017-03-28
Supplement: MOESM1 [file 12183090]

## Additional file 1: Literature search strategies for the two reviews

### Example of the search strategy used in the first review (MEDLINE):

1. health services research
2. ((health technolog\$ adj3 assessment\$) or hta).mp.
3. (NHS adj6 research\$).mp. [mp=title, original title, abstract, name of substance word, subject heading word]
4. exp \*Technology Assessment, Biomedical/
5. "research and development".mp.
6. Health Policy/
7. (payback or pay back).ti,ab.
8. (("benefit\$" or "utili#ation" or "impact" or "influenc\$" or "gain\$2") adj4 (research or evidence or health technolog\$)).ti,ab.
9. ((implement\$ or disseminat\$) adj4 (benefit\$ or impact or gain\$)).ti,ab.

Search terms (1 or 2 or 3 or 4 or 5 or 6) AND (7 or 8 or 9)

Limited to English language and years 1990–2005

### Search strategy for the second review: Search date: August 2014

| Database                                                                                                                        | Search Strategy                                                                                                                                                                                                                                                                                                                                                                                                                                                                                                                                                                                                                                                                                                                                                                                                                                                                                                                                                                                                                                                                                                                                                                                                                                                                                                                                                         | Download file |
|---------------------------------------------------------------------------------------------------------------------------------|-------------------------------------------------------------------------------------------------------------------------------------------------------------------------------------------------------------------------------------------------------------------------------------------------------------------------------------------------------------------------------------------------------------------------------------------------------------------------------------------------------------------------------------------------------------------------------------------------------------------------------------------------------------------------------------------------------------------------------------------------------------------------------------------------------------------------------------------------------------------------------------------------------------------------------------------------------------------------------------------------------------------------------------------------------------------------------------------------------------------------------------------------------------------------------------------------------------------------------------------------------------------------------------------------------------------------------------------------------------------------|---------------|
| Ovid<br>MEDLINE(R)<br>without<br>Revisions <1996<br>to August Week<br>2 2014><br><br>Saved as med-<br>impact-final-<br>strategy | <ol style="list-style-type: none"> <li>1 Health Services Research/ (21575)</li> <li>2 ((health technolog\$ adj3 assessment\$) or hta).mp. (2254)</li> <li>3 (NHS adj6 research\$).mp. [mp=title, abstract, original title, name of substance word, subject heading word, keyword heading word, protocol supplementary concept word, rare disease supplementary concept word, unique identifier] (316)</li> <li>4 exp *Technology Assessment, Biomedical/ (2993)</li> <li>5 *Biomedical Technology/ec, mt, og, sn, td [Economics, Methods, Organization &amp; Administration, Statistics &amp; Numerical Data, Trends] (848)</li> <li>6 Health Policy/ (35849)</li> <li>7 1 or 2 or 3 or 4 or 5 or 6 (60818)</li> <li>8 (payback or pay back).ti,ab. (239)</li> <li>9 (("benefit\$" or "utili#ation" or "impact" or "gains" or "returns") adj5 (research or evidence or health technolog#)).ti,ab. (18997)</li> <li>10 *"diffusion of innovation"/ (6104)</li> <li>11 *Information Dissemination/mt [Methods] (1903)</li> <li>12 *Program Evaluation/ (5976)</li> <li>13 *Policy making/ (3089)</li> <li>14 *Cost-Benefit Analysis/mt, sn, td [Methods, Statistics &amp; Numerical Data, Trends] (607)</li> <li>15 8 or 9 or 10 or 11 or 12 or 13 or 14 (36356)</li> <li>16 15 and 7 (2923)</li> <li>17 limit 16 to (english language and yr="2005 -Current")</li> </ol> | 494           |

|                                                                                      |                                                                                                                                                                                                                                                                                                                                                                                                                                                                                                                                                                                                                                                                                                                                                                                                                                                                                                                                                                                                                                                                                                                                                                                                                                                                                                                           |     |
|--------------------------------------------------------------------------------------|---------------------------------------------------------------------------------------------------------------------------------------------------------------------------------------------------------------------------------------------------------------------------------------------------------------------------------------------------------------------------------------------------------------------------------------------------------------------------------------------------------------------------------------------------------------------------------------------------------------------------------------------------------------------------------------------------------------------------------------------------------------------------------------------------------------------------------------------------------------------------------------------------------------------------------------------------------------------------------------------------------------------------------------------------------------------------------------------------------------------------------------------------------------------------------------------------------------------------------------------------------------------------------------------------------------------------|-----|
|                                                                                      | (1842)<br>18 limit 17 to (evaluation studies or "review" or systematic reviews) (494)                                                                                                                                                                                                                                                                                                                                                                                                                                                                                                                                                                                                                                                                                                                                                                                                                                                                                                                                                                                                                                                                                                                                                                                                                                     |     |
| Database: Ovid MEDLINE(R) In-Process & Other Non-Indexed Citations <August 13, 2014> | 1 Health Services Research/ (0)<br>2 ((health technolog\$ adj3 assessment\$) or hta).mp. (524)<br>3 (NHS adj6 research\$).mp. [mp=title, abstract, original title, name of substance word, subject heading word, keyword heading word, protocol supplementary concept word, rare disease supplementary concept word, unique identifier] (43)<br>4 exp *Technology Assessment, Biomedical/ (0)<br>5 *Biomedical Technology/ec, mt, og, sn, td [Economics, Methods, Organization & Administration, Statistics & Numerical Data, Trends] (0)<br>6 "research and development".mp. (975)<br>7 Health Policy/ (0)<br>8 1 or 2 or 3 or 4 or 5 or 6 or 7 (1531)<br>9 (payback or pay back).ti,ab. (31)<br>10 (("benefit\$" or "utili#ation" or "impact" or "gains") adj5 (research or evidence or health technolog#)).ti,ab. (2857)<br>11 ((implement\$ or disseminat\$) adj2 (benefit\$ or impact or gain)).ti,ab. (167)<br>12 exp *"diffusion of innovation"/ (0)<br>13 *Information Dissemination/mt [Methods] (0)<br>14 *Program Evaluation/ (0)<br>15 *"Costs and Cost Analysis"/ (0)<br>16 9 or 10 or 11 or 12 or 13 or 14 or 15 (3035)<br>17 16 and 8 (50)<br>18 limit 17 to (english language and yr="2005 -Current") (43)<br>19 limit 18 to (evaluation studies or meta analysis or "review" or systematic reviews) (17) | 17  |
| Database: Embase <1996 to 2014 Week 33>                                              | 1 Health Services Research/ (21291)<br>2 ((health technolog\$ adj3 assessment\$) or hta).mp. (4277)<br>3 (NHS adj6 research\$).mp. [mp=title, abstract, subject headings, heading word, drug trade name, original title, device manufacturer, drug manufacturer, device trade name, keyword] (584)<br>4 Biomedical technology assessment/ (9191)<br>5 Health Care Policy/ (119074)<br>6 *"medical research"/ (44171)<br>7 1 or 2 or 3 or 4 or 5 or 6 (192702)<br>8 (payback or pay back).ti,ab. (333)<br>9 (("benefit\$" or "impact*" or "influenc\$" or "gain\$" or "utili#ation" or "returns") adj8 (research or evidence or health technolog\$)).ti,ab. (68728)<br>10 ((implement\$ or disseminat\$) adj4 (benefit\$ or impact* or gain\$)).ti,ab. (4188)<br>11 program impact/ (73)<br>12 8 or 9 or 10 or 11 (72921)<br>13 7 and 12 (4868)<br>14 *"diffusion of innovation"/ (4800)<br>15 *"conceptual framework"/ (909)<br>16 *"empirical research"/ (455)<br>17 *"cost benefit analysis"/ (3972)                                                                                                                                                                                                                                                                                                                    | 120 |

|                                                                                                                                                        |                                                                                                                                                                                                                                                                                                                                                                                                               |     |
|--------------------------------------------------------------------------------------------------------------------------------------------------------|---------------------------------------------------------------------------------------------------------------------------------------------------------------------------------------------------------------------------------------------------------------------------------------------------------------------------------------------------------------------------------------------------------------|-----|
|                                                                                                                                                        | 18 *theoretical study/ (278)<br>19 post hoc analysis/ (9899)<br>20 *data analysis/ (2544)<br>21 *process model/ (493)<br>22 *practice guideline/ (35560)<br>23 program evaluation/ (1301)<br>24 *information dissemination/ (3309)<br>25 14 or 15 or 16 or 17 or 18 or 19 or 20 or 21 or 22 or 23<br>or 24 (63178)<br>26 13 and 25 (157)<br>27 limit 26 to (english language and yr="2005 -Current")<br>(120) |     |
| Cochrane<br>Methodology<br>Register Issue 3<br>of 4, July 2012                                                                                         | Impact AND research                                                                                                                                                                                                                                                                                                                                                                                           | 61  |
| Health<br>Management<br>Information<br>Consortium<br>(HMIC) 1979 to<br>present<br>Records from<br>King's Fund and<br>Department of<br>Health (08/2014) | (impact AND "health research").ti,ab<br>Limited from 2005 to date                                                                                                                                                                                                                                                                                                                                             | 67  |
| CINAHL                                                                                                                                                 | (impact AND "health research").ti,ab [Limit to: Publication<br>Year 2005-2014]                                                                                                                                                                                                                                                                                                                                | 188 |
| Total records downloaded                                                                                                                               |                                                                                                                                                                                                                                                                                                                                                                                                               | 947 |
| Total records after duplicates removed and initial screening                                                                                           |                                                                                                                                                                                                                                                                                                                                                                                                               | 297 |
